# Supplementary material for: Triclosan adsorption using wastewater biosolids-derived biochar
Source: Royal Society of Chemistry journal article supplement (doi:10.1039/c6ew00127k), 2016-01-01
Supplement: c6ew00127k1.pdf [file c6ew00127k1.pdf]

Electronic Supplemental Information

## Triclosan adsorption using wastewater biosolids-derived biochar

Yiran Tong<sup>a</sup>, Brooke K. Mayer<sup>a</sup>, Patrick J. McNamara<sup>a\*</sup>

<sup>a</sup> Department of Civil, Construction and Environmental Engineering, 1637 West Wisconsin Avenue, Marquette University, Milwaukee, WI, USA

\*Corresponding author e-mail: [patrick.mcnamara@mu.edu](mailto:patrick.mcnamara@mu.edu)  
phone: (414) 288-2188

|                                                                   | Pages |
|-------------------------------------------------------------------|-------|
| S1. Triclosan structure and physical-chemical properties          | S2    |
| S2. Kinetics curve                                                | S3    |
| S3. LC-MS                                                         | S4    |
| S4. FT-IR spectra of HCl, NaOH, and Milli-Q water treated biochar | S5    |
| S5. Biochar surface zeta potential and point of zero charge       | S6    |
| S6. Isotherm model fitting                                        | S7    |
| S7. Treated wastewater effluent qualities                         | S8    |
| S8. References                                                    | S9    |

## S1. Triclosan structure and physical-chemical properties

The triclosan molecule, shown in Figure S1, is a trichlorinated binuclear aromatic that is classified as a pesticide and antimicrobial drug<sup>1</sup>. Triclosan has a pKa value of 7.9. The log K<sub>ow</sub> value of 4.76 suggests that the compound is hydrophobic. The vapor pressure of 4.65E-06 mm Hg indicates it is characterized by low volatility.

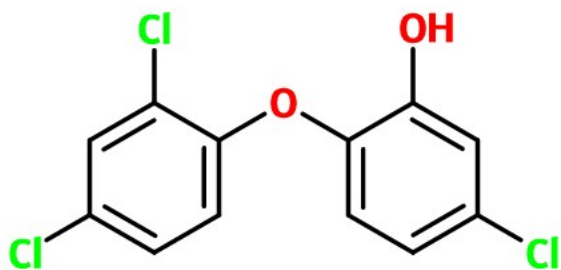

**Figure S1-** Triclosan chemical structure

## S2. Kinetics studies

To determine the adsorption equilibrium, 600°C HCl-biochar was added at a concentration of 0.4 g/L to deionized water spiked with triclosan at an initial concentration of approximately 130 µg/L. Samples were taken over time and were quantified using the LC-MS. The results are shown in Figure S2. The equilibrium time was determined as 24 hours.

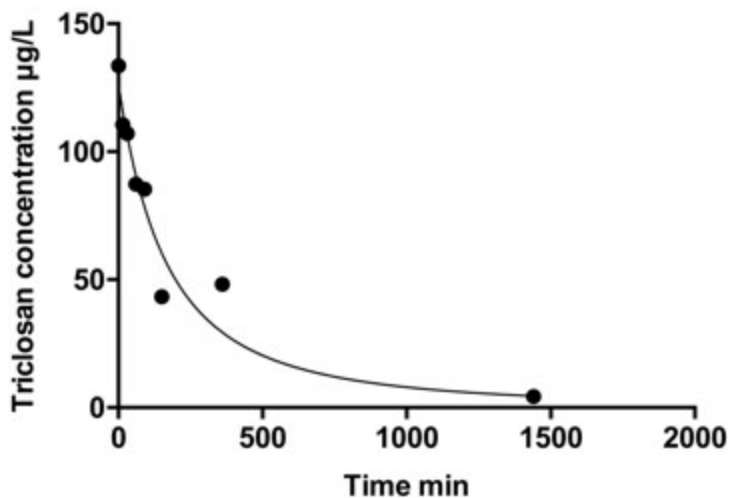

**Figure S2-** Triclosan adsorption kinetics curve

### S3. LC-MS operation

Filtered water samples were mixed with methanol (50/50) in 2 mL amber vials. A binary gradient of Milli-Q water and 100% HPLC-grade methanol was used as the eluent. The method described by Ross et al. (2016) was modified and applied. The gradient began at 80% methanol, raised to 100% methanol at 8 minutes, ramped down to 80% methanol from 8 to 9 minutes and remained at 80% methanol to 13 minutes to allow column re-equilibration. The eluent flow rate was 0.4 mL/min. Sample injections of 20  $\mu$ L were passed through a Phenomenex<sup>®</sup> (Torrance, CA, USA) Luna 3u C18 reverse-phase column (150 $\times$ 3 mm, 100 $\text{\AA}$  pore size). Triclosan was detected in mass-spectrometry with negative electrospray ionization (ESI<sup>-</sup>), at a mass-to-charge ( $m/z$ ) ratio of 287.

#### S4. FT-IR spectra of HCl, NaOH, and Milli-Q water treated biochar

Biochar, pyrolyzed at 600°C and pretreated with HCl, NaOH or Milli-Q water, was ground to fine powder (<10 µm). The scanning of each sample was 32. Variability observed in the spectra may be due to the amorphous nature of biosolids-derived biochar.

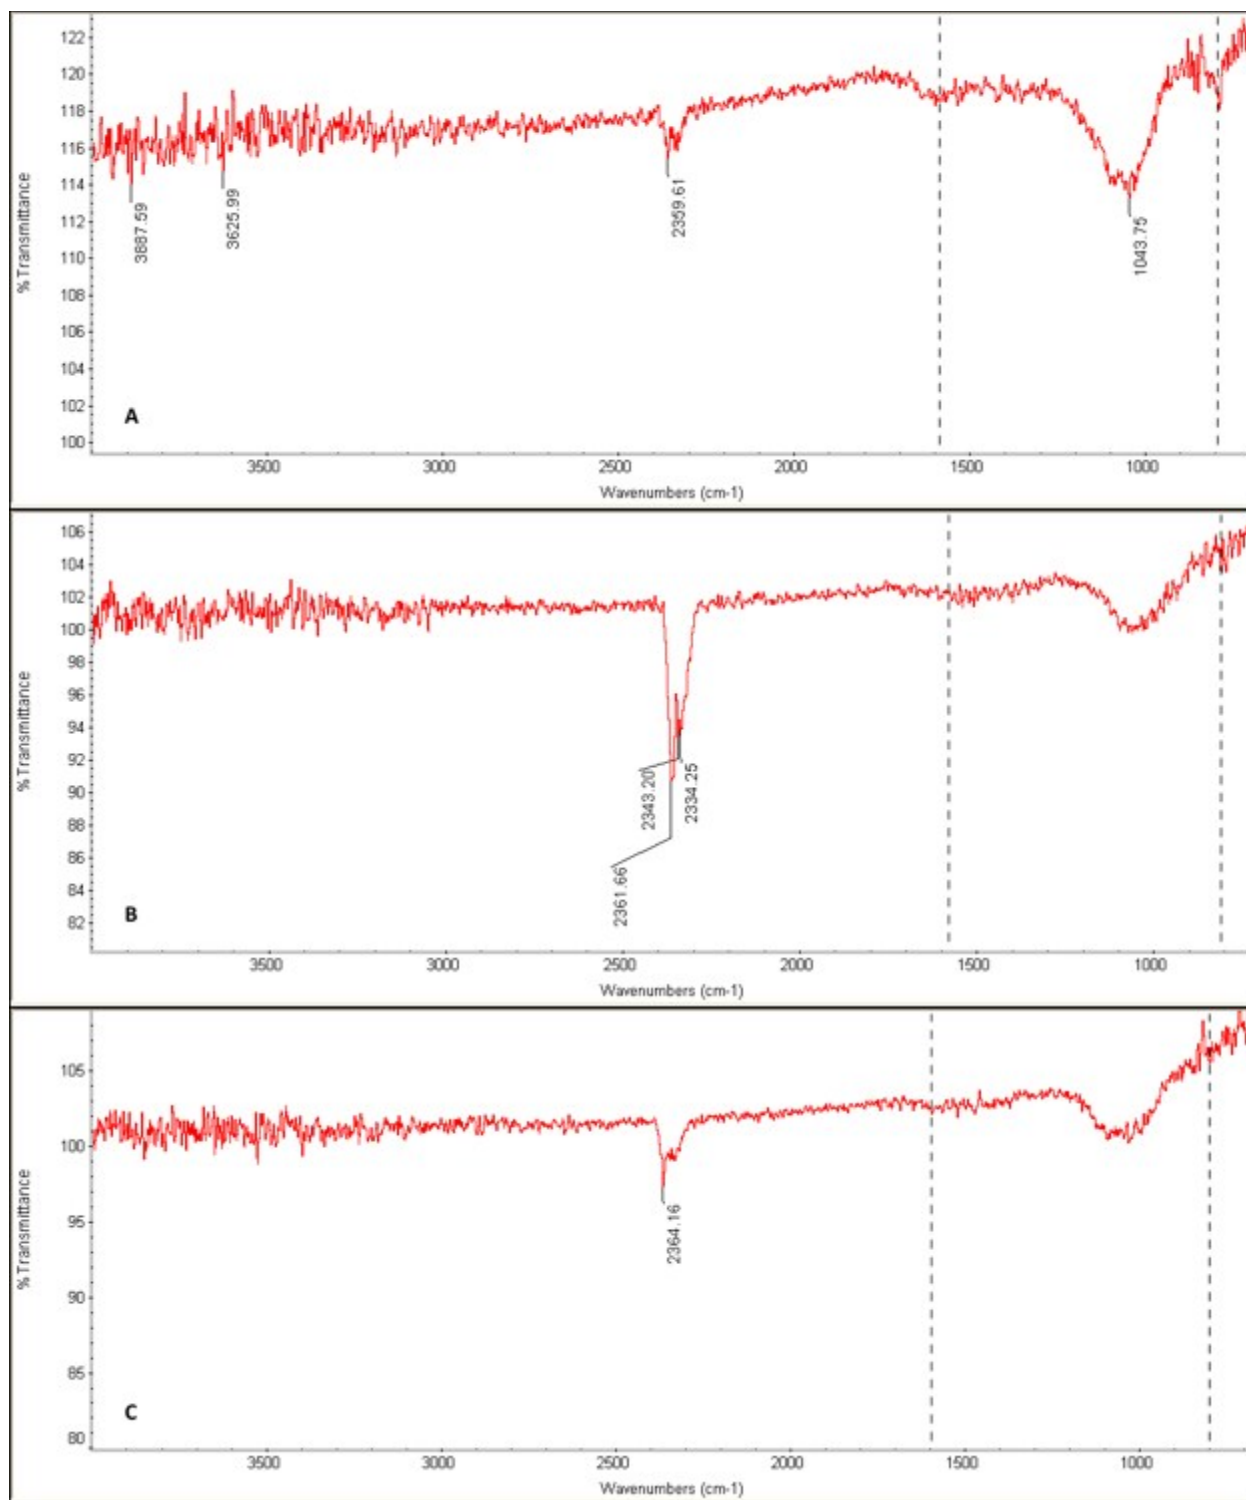

**Figure S3-** FT-IR spectra of biochar produced at 600°C, treated with A) HCl, B) NaOH, and C) Milli-Q water.

### S5. Biochar zeta potential

Biochar, pyrolyzed at 600°C and pretreated with HCl, NaOH or Milli-Q water, was ground to fine powder (<10 µm). Approximately 0.01 g of biochar powder was suspended in 40 mL of Milli-Q water. The solution pH was then adjusted with HCl or NaOH. The zeta potential was immediately measured using a Malvern Zetasizer Nano ZS (Malvern Instruments Ltd, MA, USA). Results are shown in Figure S4.

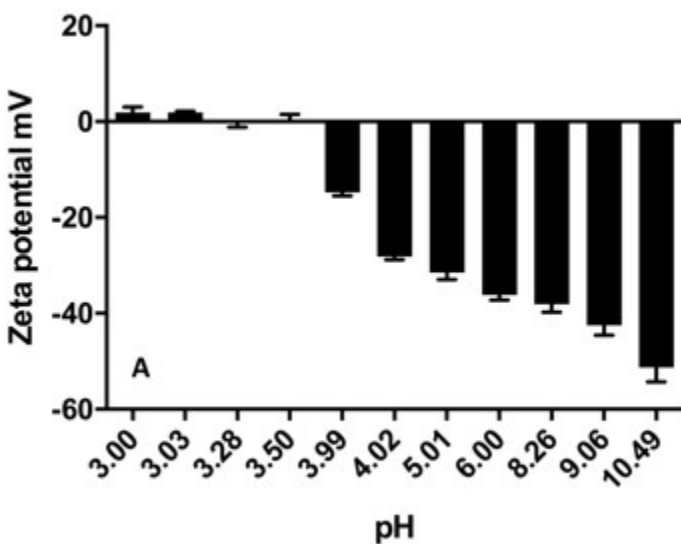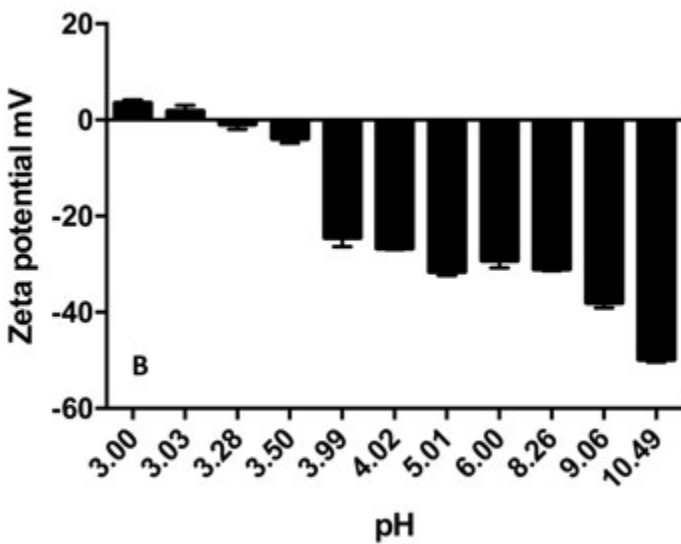

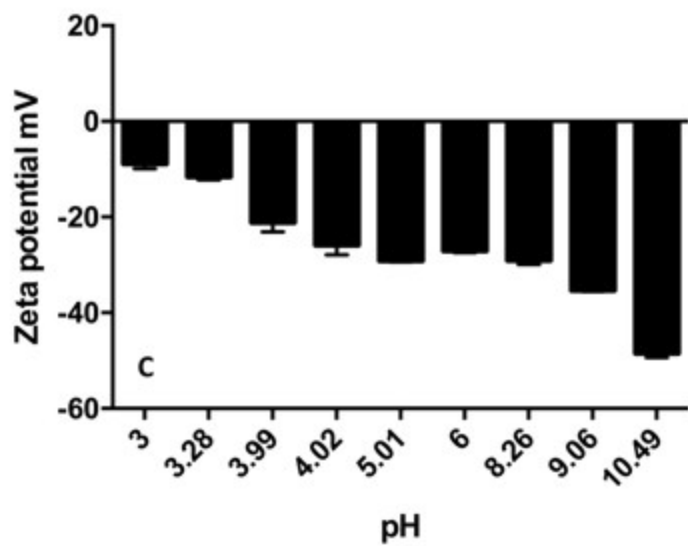

**Figure S4-** Zeta potentials of biochar produced at 600°C, pretreated with A) HCl, B) NaOH, and C) Milli-Q water.



S6. Isotherm model fitting

**Table S1**-Isotherms of HCl-biochar produced at multiple temperatures and activated carbon fitted with Linear, Langmuir and Freundlich models.

| Isotherm model | Equation                                   | Parameter        | Sorbent            |                    |                    |                    |                    | Activated carbon   |
|----------------|--------------------------------------------|------------------|--------------------|--------------------|--------------------|--------------------|--------------------|--------------------|
|                |                                            |                  | 300°C              | 500°C              | 600°C              | 700°C              | 800°C              |                    |
| Linear         | $Q_e = AC_e + B$                           | A                | 0.345              | 3.09               | 2.40               | 4.82               | 8.29               | 30.0               |
|                |                                            | B                | 120                | 190                | 237                | 153                | 332                | 1440               |
|                |                                            | R <sup>2</sup>   | 0.049              | 0.936              | 0.757              | 0.917              | 0.859              | 0.877              |
| Langmuir       | $Q_e = \frac{Q_{max}K_a C_e}{1 + K_a C_e}$ | Q <sub>max</sub> | $5.07 \times 10^3$ | $9.02 \times 10^4$ | $5.70 \times 10^4$ | $1.44 \times 10^4$ | $4.42 \times 10^3$ | $1.50 \times 10^5$ |
|                |                                            | K <sub>a</sub>   | 0.0389             | 0.0113             | 0.0151             | 0.0405             | 0.204              | 0.0345             |
|                |                                            | R <sup>2</sup>   | 0.070              | 0.867              | 0.896              | 0.76               | 0.977              | 0.967              |
| Freundlich     | $Q_e = K_F C_e^{1/n}$                      | K <sub>F</sub>   | 56.5               | 43.2               | 62.0               | 62.9               | 254                | 554                |
|                |                                            | 1/n              | 0.22               | 0.54               | 0.45               | 0.46               | 0.30               | 0.44               |
|                |                                            | R <sup>2</sup>   | 0.0593             | 0.912              | 0.835              | 0.85               | 0.977              | 0.928              |

S7. Treated wastewater effluent qualities

**Table S2**-Treated municipal wastewater effluent qualities

| <b>pH</b>  | <b>COD (mg/L)</b> | <b>TOC (mg/L)</b> | <b>Turbidity (NTU)</b> | <b>TSS (mg/L)</b> |
|------------|-------------------|-------------------|------------------------|-------------------|
| <b>7.2</b> | BD*               | 70.0              | 2.1                    | 4.6               |

\*: BD: below detection. Detection limit: 125 mg/L

## S8. References

- 1 R. U. Halden and D. H. Paull, *Environ. Sci. Technol.*, 2005, **39**, 1420–1426.
- 2 J. J. Ross, D. H. Zitomer, T. R. Miller, C. A. Weirich and P. J. McNamara, *Environ. Sci. Water Res. Technol.*, 2016.
